## CALCIUM HANDLING BY THE MAMMALIAN KIDNEY

R. J. M. BINDELS

*Department of Physiology, University of Nijmegen, Trigon Building, PO Box 9101,  
6500 HB Nijmegen, The Netherlands*

### Summary

The mammalian kidney plays a crucial role in the  $\text{Ca}^{2+}$  homeostasis of the body. To maintain a net  $\text{Ca}^{2+}$  balance, more than 98% of the filtered load of  $\text{Ca}^{2+}$  must be reabsorbed along the nephron. There are two potential pathways through which net  $\text{Ca}^{2+}$  reabsorption can occur. First, a paracellular and passive route that predominates in the proximal tubules and thick ascending limb of Henle's loop. Second, a transcellular, active transport that characterises  $\text{Ca}^{2+}$  reabsorption in the distal nephron. Transcellular  $\text{Ca}^{2+}$  transport involves passive influx across the luminal membrane, diffusion through the cytosol and active extrusion across the peritubular membrane. The rate of active  $\text{Ca}^{2+}$  reabsorption is controlled by the calciotropic hormones, i.e. parathyroid hormone, calcitonin and 1,25-dihydroxyvitamin  $\text{D}_3$ . The application of new techniques in renal physiology has greatly increased our knowledge of the renal handling of  $\text{Ca}^{2+}$  and allowed the examination of  $\text{Ca}^{2+}$  transport processes at the cellular and subcellular level. This review focuses primarily on the mechanisms and regulation of transcellular  $\text{Ca}^{2+}$  transport. The distal nephron consists of at least four discrete segments and the contribution of each segment to active transcellular  $\text{Ca}^{2+}$  is discussed in detail.

### Introduction

In mammals, overall  $\text{Ca}^{2+}$  homeostasis is maintained by the concerted action of the intestine, bone and kidney. Given a daily dietary calcium intake of 1000mg, net intestinal absorption amounts to about 200mg, with the remaining 800mg being excreted in the faeces. To maintain a net balance, the kidney must excrete approximately 200mg, amounting to less than 2% of the filtered calcium load (Costanzo and Windhager, 1992). Thus, it is evident that the kidney is a crucial organ for the regulation of the calcium balance. As a result, a considerable amount of renal research has focused on the handling of calcium. Our present knowledge of renal calcium handling is mainly based on micropuncture and *in vitro* microperfusion techniques with which the segmental localisation of  $\text{Ca}^{2+}$  transport, its hormonal dependence and the relationship between  $\text{Na}^+$  and  $\text{Ca}^{2+}$  reabsorption have been investigated. Although these techniques have been extremely useful, their limitations precluded further advances. The development of new techniques, such as single-cell fluorescent video microscopy, molecular biological approaches, patch-clamp and cell culture applications, has greatly furthered our insight into the mechanisms and regulation of renal  $\text{Ca}^{2+}$  transport. This review focuses on the

Key words: calcium reabsorption, cortical collecting duct, dorsal convoluted tubule, connecting tubule, calcibindin- $\text{D}_{28\text{K}}$ .

regulation of active transcellular  $\text{Ca}^{2+}$  reabsorption in the distal nephron. Within this framework, the general handling of  $\text{Ca}^{2+}$  by the mammalian kidney will be briefly summarized and subsequently the physiological relevance of recent studies on isolated perfused tubules and isolated and cultured renal cells will be discussed in detail.

### Mechanisms of $\text{Ca}^{2+}$ transport

Following its filtration across the glomerular capillaries,  $\text{Ca}^{2+}$  can be reabsorbed along the nephron by two potential pathways (Fig. 1). One is a paracellular and passive movement in response to an electrical or chemical gradient and the other is a transcellular active transport route, which consists of passive influx across the luminal membrane, diffusion through the cytosol and active extrusion across the opposing basolateral membrane (van Os, 1987). Although  $\text{Ca}^{2+}$  influx proceeds *via* a steep electrochemical gradient, the molecular nature of this  $\text{Ca}^{2+}$  entry pathway is still undetermined. Conceivably, a carrier-mediated process or  $\text{Ca}^{2+}$  channels may be present to allow permeation of  $\text{Ca}^{2+}$  through the bilayer forming the plasma membrane. Once in the cell,  $\text{Ca}^{2+}$  diffuses to the opposing basolateral membrane, while intracellular  $\text{Ca}^{2+}$  concentration ( $[\text{Ca}^{2+}]_i$ ) is maintained within a narrow range to allow normal cell functioning. This is achieved by controlling the compartmentalisation of  $\text{Ca}^{2+}$  in intracellular organelles and by the formation of complexes with vitamin- $\text{D}_3$ -dependent  $\text{Ca}^{2+}$ -binding proteins, such as calbindin- $\text{D}_{28\text{K}}$ . Theoretical analysis and experimental evidence have confirmed the need for facilitated diffusion of  $\text{Ca}^{2+}$  through the cytosol.

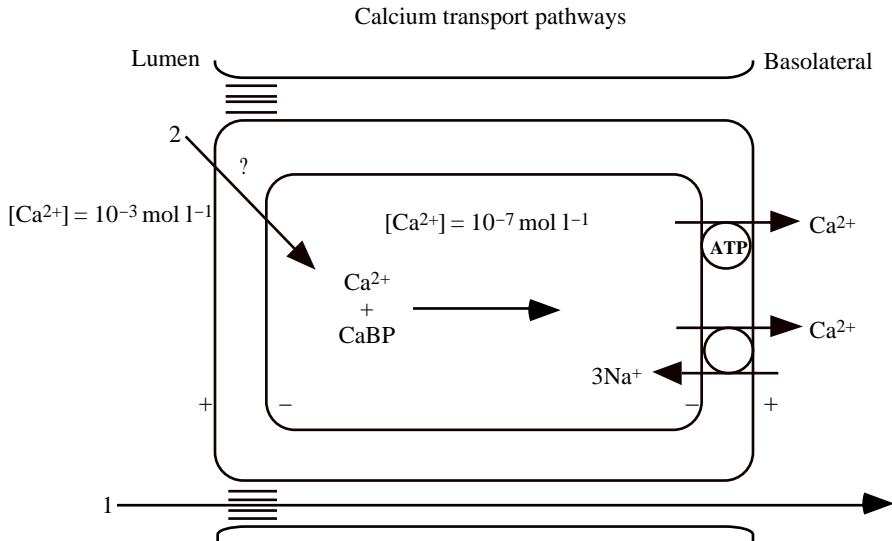

Fig. 1. Pathways of  $\text{Ca}^{2+}$  reabsorption in the nephron. The paracellular route (1) driven by electrical and chemical gradients and transcellular  $\text{Ca}^{2+}$  transport (2), which consists of passive influx across the luminal membrane, binding to calbindin- $\text{D}_{28\text{K}}$  and subsequent diffusion through the cytosol with active extrusion at the peritubular membrane.  $\text{CaBP}$ , a calcium-binding protein such as calbindin- $\text{D}_{28\text{K}}$ .

Presumably, calbindin-D<sub>28K</sub> increases the diffusional flux of Ca<sup>2+</sup> by increasing brush-border entry of Ca<sup>2+</sup>, through decreasing [Ca<sup>2+</sup>]<sub>i</sub> near the brush border, through increasing cytosolic flow by acting as a diffusional carrier and through increasing efflux by feeding Ca<sup>2+</sup> to the basolateral extrusion mechanisms (Feher *et al.* 1992). In this scheme, the diffusion of Ca<sup>2+</sup> through the cytosol is the rate-limiting step in transcellular Ca<sup>2+</sup> movement. In the basolateral membrane, two Ca<sup>2+</sup> transporters, Ca<sup>2+</sup>-ATPase and a Na<sup>+</sup>/Ca<sup>2+</sup> exchange mechanism, have been shown to be involved in the efflux of Ca<sup>2+</sup> from the cell.

### Ca<sup>2+</sup> reabsorption along the nephron

Micropuncture studies have shown that approximately 55% of the filtered load of Ca<sup>2+</sup> is reabsorbed along the proximal convoluted tubule and an additional 10% is reabsorbed in the proximal straight tubule (Suki, 1979; Suki and Rouse, 1992; Costanzo and Windhager, 1992). Passive driving forces are the major determinants of Ca<sup>2+</sup> transport in these nephron segments. Hence, Ca<sup>2+</sup> reabsorption is a consequence of Na<sup>+</sup> and fluid reabsorption and is therefore obligatorily coupled to Na<sup>+</sup> transport (Suki and Rouse, 1992). Controversy exists as to whether some residual Ca<sup>2+</sup> transport occurs *via* an active, transcellular pathway (Ng *et al.* 1984; Suki and Rouse, 1992). Ca<sup>2+</sup> reabsorption in the loop of Henle has been attributed to the thick ascending limb, since the thin limbs have been shown to be relatively impermeable to Ca<sup>2+</sup> (Rouse *et al.* 1980). It is generally accepted that about 20% of filtered Ca<sup>2+</sup> is reabsorbed in the thick ascending loop of Henle (Suki, 1979; Costanzo and Windhager, 1992). The lumen-positive transepithelial potential difference generated by Cl<sup>-</sup> reabsorption provides a driving force for passive Ca<sup>2+</sup> reabsorption through the paracellular pathway. Other studies suggested that there may be an additional, possibly active, Ca<sup>2+</sup> transport mechanism (Imai, 1978; Suki *et al.* 1980; Friedman, 1988). In the medullary segment, calcitriol enhances Ca<sup>2+</sup> reabsorption, while in the cortical segment parathyroid hormone (PTH) exerts a stimulatory effect. In the distal convoluted and connecting tubule, Ca<sup>2+</sup> reabsorption amounts to about 10% of the filtered load (Costanzo and Windhager, 1992). Both segments are a major regulatory site for Ca<sup>2+</sup> excretion in the urine. Transport appears to be active, as it can proceed against an electrochemical gradient. Here, hormones such as PTH and calcitriol stimulate Ca<sup>2+</sup> reabsorption (Costanzo and Windhager, 1992). In the distal convoluted tubule, Ca<sup>2+</sup> reabsorption parallels Na<sup>+</sup> reabsorption, but thiazide diuretics dissociate Na<sup>+</sup> and Ca<sup>2+</sup> reabsorption by inhibiting Na<sup>+</sup> transport and stimulating Ca<sup>2+</sup> reabsorption (Costanzo and Windhager, 1978). Finally, the contribution of the collecting duct to overall Ca<sup>2+</sup> reabsorption is small. Although little is known about Ca<sup>2+</sup> transport in this segment, it is probably active (Sharegi and Stoner, 1981; Bourdeau and Hellstrom-Stein, 1982). The segmental Ca<sup>2+</sup> reabsorption is summarized in Fig. 2.

### Transcellular Ca<sup>2+</sup> reabsorption in the distal nephron

The distal tubule is the main site of active transcellular Ca<sup>2+</sup> transport and determines the fine tuning of Ca<sup>2+</sup> excretion to the urine. Hitherto, it has been difficult to identify the segments or cell types responsible. This is due both to the heterogeneous nature of this part

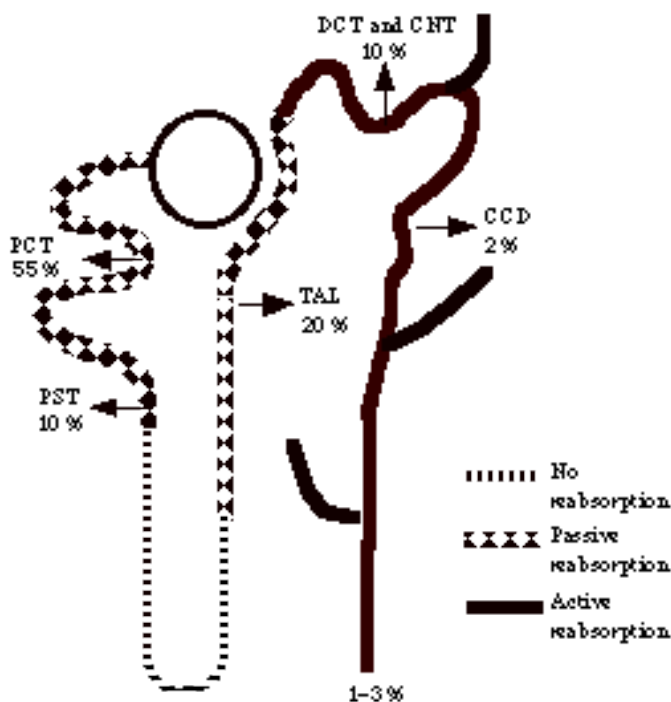

Fig. 2. Segmental  $\text{Ca}^{2+}$  reabsorption. The contribution of each segment to overall  $\text{Ca}^{2+}$  reabsorption is depicted as a percentage of the total. CCD, cortical collecting duct; CNT, connecting tubule; DCT, distal convoluted tubule; PCT, proximal convoluted tubule; PST, proximal straight tubule; TAL, thick ascending limb of Henle's loop.

of the nephron, in which numerous cell types can be recognized, and to considerable species differences. Identification of the cell types responsible has been greatly expedited by immunohistological localisation of the calcium-binding protein, calbindin- $\text{D}_{28\text{K}}$  which, as mentioned above, facilitates transcellular  $\text{Ca}^{2+}$  movement. In mammals, such as rat, rabbit, pig, monkey and human, calbindin- $\text{D}_{28\text{K}}$  is present in all the cells of the distal convoluted tubule and in most cells of the connecting tubule (Taylor *et al.* 1982; Schreiner *et al.* 1983; Bindels *et al.* 1991b). In rabbit, cells of the cortical collecting tubule also contain calbindin- $\text{D}_{28\text{K}}$ , although less frequently (Taylor *et al.* 1982; R. J. M. Bindels, unpublished observation); in the rat, the presence of calbindin- $\text{D}_{28\text{K}}$  is restricted to the transition between the connecting tubule and the cortical collecting duct (Taylor *et al.* 1982; Bindels *et al.* 1991b) (Fig. 3). Apparently, the relative contribution of the individual distal segments to active  $\text{Ca}^{2+}$  reabsorption differs significantly between rat and rabbit. In rabbit, the connecting tubule seems to be the most important site of hormone-regulated active  $\text{Ca}^{2+}$  reabsorption, whereas in the rat the distal convoluted tubule is more dominant (Morel, 1981; Imai, 1989; Bourdeau and Lau, 1990). Furthermore, the distal nephron of the rat lacks clear-cut segmentation with sharp transitions (Morel, 1981). Conceivably, hormone responsiveness may be determined by this heterogeneity in cell and site.

Recently, several groups have presented detailed information on the mechanism and

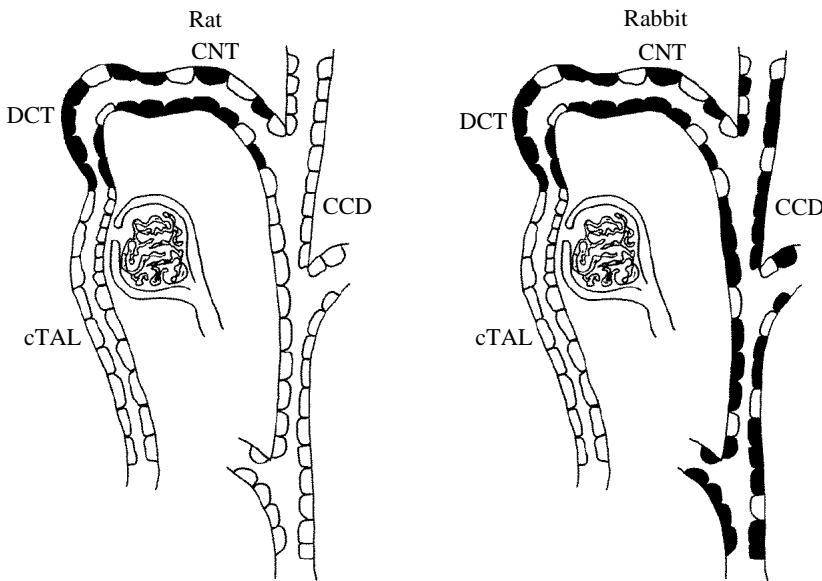

Fig. 3. Schematic representation of calbindin- $D_{28K}$  distribution (dark cells) along the nephron from the cortex of rat (left) and rabbit (right) kidney. CCD, cortical collecting duct; CNT, connecting tubule; cTAL, cortical thick ascending limb of Henle's loop; DCT, distal convoluted tubule. Modified after Taylor *et al.* (1982) and Bindels *et al.* (1991b).

regulation of transcellular  $Ca^{2+}$  transport in the distal nephron. The involvement of all distal segments in calcium reabsorption is now well documented, although the cellular mechanisms remain to be clarified. Integration of this information into a single model of cellular  $Ca^{2+}$  transport is not possible, mainly because of the complexity of the various transport steps and incomplete information on the individual segments. Therefore, the characteristics of active  $Ca^{2+}$  transport in the distal segments, such as the thick ascending limb of Henle's loop, the distal convoluted tubule, the connecting tubule and the cortical collecting duct, will be discussed individually. Finally, at the end of each paragraph a cellular model is presented summarizing the various  $Ca^{2+}$  transporters that appear to participate in the transcellular movement of  $Ca^{2+}$  in that particular segment.

### Thick ascending limb of Henle's loop

A considerable fraction of filtered  $Ca^{2+}$  is reabsorbed in the thick ascending limb of Henle's loop. Several groups have investigated the mechanisms of  $Ca^{2+}$  transport using micropuncture techniques and microperfused tubules in both rabbit and mouse, but the results are equivocal. Passive reabsorption is suggested by the transepithelial voltage-dependence and the furosemide-sensitivity of  $Ca^{2+}$  fluxes (Bourdeau and Burg, 1979; Wittner *et al.* 1993). Hormonal stimulation of  $Ca^{2+}$  transport occurs through hormone-mediated transepithelial voltage alterations (Wittner *et al.* 1993). Other studies suggest that there is an additional active  $Ca^{2+}$  reabsorption, which can be stimulated by PTH and calcitonin (Costanzo and Windhager, 1978; Suki *et al.* 1980; Friedman, 1988). It is

conceivable that under resting conditions passive  $\text{Ca}^{2+}$  reabsorption prevails and that after hormonal stimulation an additional active cellular pathway is activated (Friedman and Gesek, 1993). This controversy has not been resolved, but the conspicuous absence of calbindin- $\text{D}_{28\text{K}}$  from this nephron segment strongly suggests an insignificant contribution of active, transcellular  $\text{Ca}^{2+}$  transport to the overall  $\text{Ca}^{2+}$  reabsorption.

Examination of the cellular mechanism of  $\text{Ca}^{2+}$  transport in the cortical thick ascending limb of Henle's loop has not provided additional evidence for the presence of active  $\text{Ca}^{2+}$  transport (Fig. 4). In cultured mouse cortical thick ascending limb of Henle's loop and distal convoluted cells, Bacskai and Friedman (1990) demonstrated a PTH-activated dihydropyridine-sensitive  $\text{Ca}^{2+}$  entry pathway. Subsequent studies by the same authors, performed with immortalized cells of similar origin, extended their previous results. PTH primarily increased  $\text{Cl}^-$  conductance and the subsequent membrane hyperpolarisation enhanced  $\text{Ca}^{2+}$  entry through putative  $\text{Ca}^{2+}$  channels (Gesek and Friedman, 1992). The physiological significance of these data with respect to  $\text{Ca}^{2+}$  reabsorption is not clear for two reasons. First, a mixture of distal nephron segments, i.e. the thick ascending limb of Henle's loop and the distal convoluted tubules, was originally used and it is, therefore, difficult to assign these findings to a specific segment. Second, localisation of the  $\text{Ca}^{2+}$  entry pathway or correlation with transcellular  $\text{Ca}^{2+}$  fluxes was not possible, since the observations were not made on polarized confluent monolayers. Their findings could also be interpreted as a basolateral  $\text{Ca}^{2+}$  entry playing a role in signal transduction of PTH. In this respect, it is interesting that a pH-sensitive  $\text{Ca}^{2+}$  influx pathway in the basolateral membrane of the rabbit cortical thick ascending limb of Henle's loop has recently been demonstrated (Hanaoka *et al.* 1993).

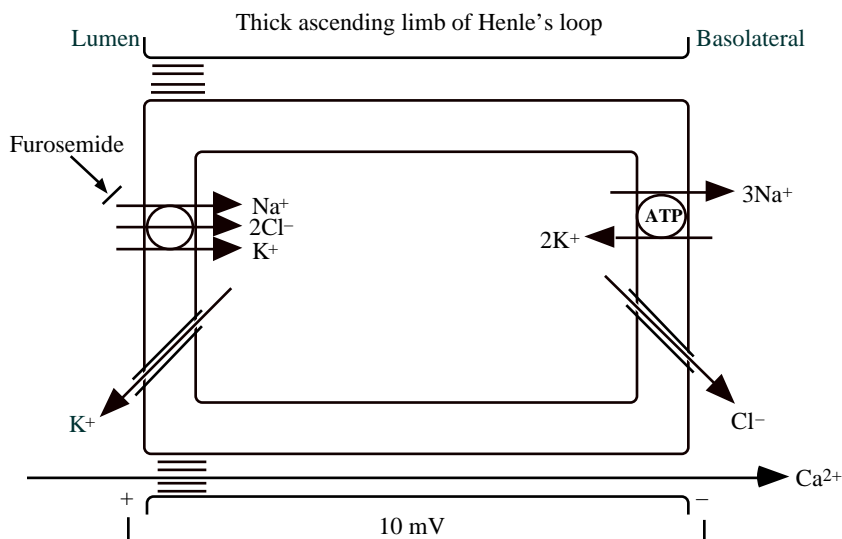

Fig. 4. Model of  $\text{Ca}^{2+}$  reabsorption in the thick ascending limb of Henle's loop. The lumen-positive transepithelial potential difference generated by furosemide-sensitive  $\text{Cl}^-$  reabsorption provides a driving force for passive  $\text{Ca}^{2+}$  reabsorption through a paracellular pathway.

There is also no indication of what kind of basolateral  $\text{Ca}^{2+}$  extrusion mechanism is present in this segment. No functional evidence could be obtained for the presence of a basolateral  $\text{Na}^+/\text{Ca}^{2+}$  exchanger in rabbit thick ascending limb of Henle's loop (Hanoaka *et al.* 1993). Furthermore, immunohistological and molecular biological studies failed to demonstrate the presence of a  $\text{Na}^+/\text{Ca}^{2+}$  exchanger in the thick ascending limb of Henle's loop (Reilly *et al.* 1992; Reilly and Shugrue, 1992; Yu *et al.* 1992b). Finally, only a low activity of a  $\text{Ca}^{2+}/\text{Mg}^{2+}$ -ATPase was detected in this segment, albeit sufficient activity to account for active  $\text{Ca}^{2+}$  transport (Doucet and Katz, 1982).

### Distal convoluted tubule

In the distal convoluted tubule,  $\text{Ca}^{2+}$  reabsorption proceeds against both chemical and electrical gradients and is, therefore, by definition active in nature. The paracellular permeability for  $\text{Ca}^{2+}$  is very low (Costanzo and Windhager, 1992). Depending on the species, hormones such as PTH and calcitonin stimulate  $\text{Ca}^{2+}$  transport (Shareghi and Stoner, 1981; Imai, 1989; Shimizu *et al.* 1990). The presence of vitamin-D<sub>3</sub>-dependent calbindin-D<sub>28K</sub> suggests that 1,25-dihydroxyvitamin D<sub>3</sub> (1,25[OH]<sub>2</sub>D<sub>3</sub>) exerts a stimulatory action in this segment (Taylor *et al.* 1982; Bindels *et al.* 1991b), but at present there is no experimental evidence for such action. In general, only a few investigators have addressed the role of the distal convoluted tubule in the regulation of  $\text{Ca}^{2+}$  reabsorption and this reflects the technical difficulties involved in the identification, micropuncture and microperfusion of this nephron segment (Suki, 1979). Consequently, our knowledge of the mechanism of cellular  $\text{Ca}^{2+}$  transport in this segment is still incomplete (Fig. 5).

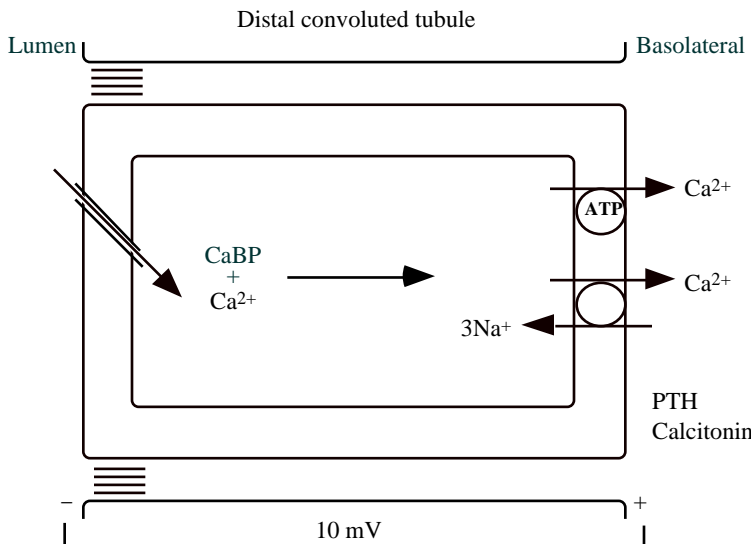

Fig. 5. Model of transcellular  $\text{Ca}^{2+}$  transport in the distal convoluted tubule. For an explanation, see the text. CaBP, a calcium-binding protein such as calbindin-D<sub>28K</sub>; PTH, parathyroid hormone.

Recently, Poncet *et al.* (1992) characterised a  $\text{Ca}^{2+}$ -permeable channel in the apical membrane of primary cultures of the rabbit distal convoluted tubule. This is the first study using patch-clamp analysis to identify a  $\text{Ca}^{2+}$  channel in the distal nephron. The apical  $\text{Ca}^{2+}$  channel had a conductance of approximately 8pS and was blocked by  $\text{La}^{3+}$  and by high concentrations of verapamil and nifedipine. This channel could well be the apical entry pathway in transepithelial calcium transport. Interestingly, Yu *et al.* (1992a) recently identified an mRNA encoding partly for funnel web spider toxin-sensitive P-type  $\text{Ca}^{2+}$  channel that was exclusively expressed in the distal convoluted tubule of the rat.

The presence of both a  $\text{Ca}^{2+}$ -ATPase and a  $\text{Na}^+/\text{Ca}^{2+}$  exchange contributing to  $\text{Ca}^{2+}$  efflux across the basolateral membrane has been well documented. Epitopes for a plasmalemma  $\text{Ca}^{2+}$ -ATPase were exclusively present in the basolateral membrane of this segment in human and rat, as demonstrated with immunocytochemistry using a monoclonal antibody against the human erythrocyte  $\text{Ca}^{2+}/\text{Mg}^{2+}$ -ATPase (Borke *et al.* 1987, 1989). The immunoreactivity co-localised perfectly with the presence of calbindin- $\text{D}_{28\text{K}}$  in the distal nephron of the rat, which suggests that, in addition to the distal convoluted tubule, the connecting tubule also expresses a  $\text{Ca}^{2+}$ -ATPase immunologically similar to that of human erythrocyte membranes. This idea is confirmed by the presence of numerous intercalated cells in the immunopositive segment. Another approach was used by Magocsi *et al.* (1992), who studied the localisation of mRNAs coding for isoenzymes of rat plasma membrane  $\text{Ca}^{2+}$ -ATPase using polymerase chain reaction (PCR) analysis. mRNA for one isoenzyme, rPMCA2, was detected in microdissected proximal tubules, cortical thick ascending limb of Henle's loop, distal convoluted tubules and perhaps also in cortical collecting ducts. The remaining tubule segments were not examined. The presence of this isoenzyme in most cortical tubules suggests a house-keeping function for rPMCA2 rather than a specific role in active transcellular  $\text{Ca}^{2+}$  transport. The molecular cloning of the cardiac  $\text{Na}^+/\text{Ca}^{2+}$  exchanger enabled other investigators to identify a similar antiporter in the mammalian kidney (Reilly and Shugrue, 1992; Yu *et al.* 1992b). PCR analysis performed on microdissected rat tubules revealed that the  $\text{Na}^+/\text{Ca}^{2+}$  exchanger is primarily expressed in the distal convoluted tubule (Yu *et al.* 1992b). Confusingly, in rabbit kidney, specific staining for immunoreactive  $\text{Na}^+/\text{Ca}^{2+}$  exchanger was found only along the basolateral membrane of the connecting tubules compared with the distal convoluted tubules in the rat (Reilly *et al.* 1992). Presumably, expression of the  $\text{Na}^+/\text{Ca}^{2+}$  exchanger in the distal nephron varies between different species. Finally, the relative contributions of the  $\text{Na}^+/\text{Ca}^{2+}$  exchanger and  $\text{Ca}^{2+}$ -ATPase to active  $\text{Ca}^{2+}$  reabsorption remain to be determined.

### Connecting tubule

This tubule segment, which connects the distal convoluted tubule with the initial portion of the cortical collecting duct, is a heterogeneous epithelium consisting of at least two different cell types: connecting tubule cells and intercalated cells (Madsen *et al.* 1988). Only the former contain the vitamin- $\text{D}_3$ -dependent calbindin- $\text{D}_{28\text{K}}$  (Bindels *et al.* 1991b).  $\text{Ca}^{2+}$  reabsorption in this segment has been extensively studied by a diversity of technical approaches applied to both isolated perfused tubules and cultured cells. As in



the distal convoluted tubule,  $\text{Ca}^{2+}$  reabsorption is active because it proceeds against a steep electrochemical gradient. In isolated perfused connecting tubules, it has been demonstrated that PTH stimulates  $\text{Ca}^{2+}$  reabsorption through the activation of protein kinase A (Shareghi and Stoner, 1981; Imai, 1989; Shimizu *et al.* 1990). These findings have been confirmed in primary cultures of the cortical collecting system (Bindels *et al.* 1991a), as shown in Fig. 6. This culture system has been established in our laboratory from a mixture of cells from connecting tubules and cortical collecting ducts isolated by immunodissection from rabbit kidney. When cultured on permeable filters, the cells exhibited several functions of the original epithelium (Bindels *et al.* 1991a). Net basal  $\text{Ca}^{2+}$  reabsorption across the monolayers ranged between 15 and 20  $\mu\text{mol min}^{-1} \text{mm}^{-2}$ . This value agrees with published values obtained in isolated perfused tubules (Costanzo and Windhager, 1978; Shimizu *et al.* 1990). In addition to protein kinase A, activation of protein kinase C plays a regulatory role in transcellular  $\text{Ca}^{2+}$  reabsorption. The phorbol ester 12-*o*-tetradecanoylphorbol 13-acetate (TPA) inhibited  $\text{Ca}^{2+}$  reabsorption and increased membrane-associated protein kinase C activity in primary cultures of rabbit cortical collecting system (Bindels *et al.* 1993) (Fig. 7). Interestingly, several kidney hormones, such as PTH, bradykinin, calcitriol and vasopressin, have been shown to activate protein-kinase-C-dependent signalling pathways (Shayman and Morrison, 1985; Hruska *et al.* 1987; Burnatowska-Hledin and Spielman, 1989). Therefore, further studies are needed to delineate the importance of this regulatory pathway. The final target for protein kinase C action has not yet been identified, but it could well be the apical  $\text{Ca}^{2+}$  channel, the basolateral  $\text{Ca}^{2+}$ -ATPase or the  $\text{Na}^+/\text{Ca}^{2+}$  exchanger. The phorbol ester treatment also abolished the transepithelial potential and doubled the transepithelial resistance because it also inhibited transepithelial  $\text{Na}^+$  transport. Therefore, possible effects of protein kinase C activation on junctional permeability can be excluded. In the same primary culture system, we have demonstrated for the first time that  $1,25[\text{OH}]_2\text{D}_3$

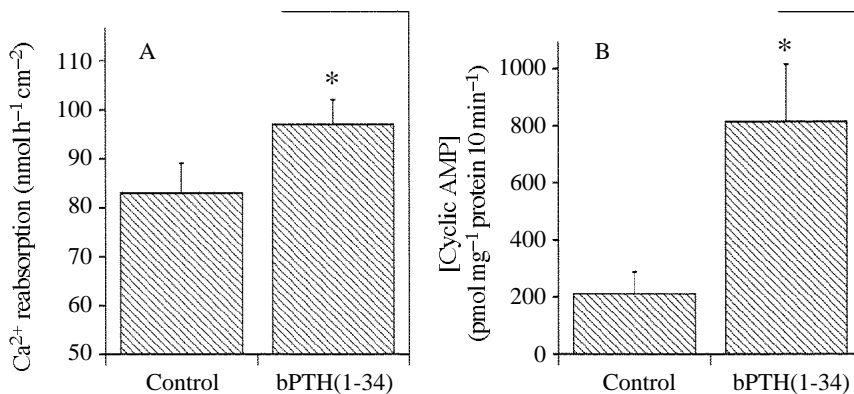

Fig. 6. Effect of bPTH(1-34) on transcellular  $\text{Ca}^{2+}$  transport (A) and cytosolic cyclic AMP concentration (B) in rabbit cortical collecting system in primary culture. bPTH(1-34) was applied only to the basolateral compartment at a concentration of  $10^{-7} \text{mol l}^{-1}$ . Values are mean + S.E. ( $N=5$ ). \* denotes a significantly different value from the control ( $P<0.05$ ). Modified after Bindels *et al.* (1991a).

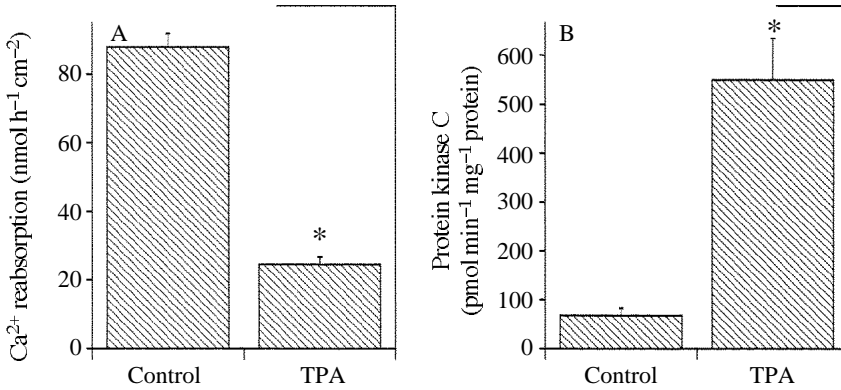

Fig. 7. Effect of the protein kinase C activator, 12-*o*-tetradecanoylphorbol 13-acetate (TPA) on transcellular  $\text{Ca}^{2+}$  transport (A) and membrane-associated protein kinase C activity (B) in rabbit cortical collecting system in primary culture. TPA was added to both compartments at a concentration of  $10^{-7} \text{ mol l}^{-1}$ . Values are mean + s.e. ( $N=5$ ). \* denotes a significantly different value from the control ( $P<0.05$ ). Modified after Bindels *et al.* (1993).

stimulates transcellular  $\text{Ca}^{2+}$  reabsorption and concomitantly increases cytosolic calbindin- $\text{D}_{28\text{K}}$  content (Bindels *et al.* 1991a) (Fig. 8). Maximal stimulation occurred between 48 and 72h after exposure to calcitriol, suggesting that the mechanism of stimulation is analogous to that of classical steroid hormones, which implies that  $1,25[\text{OH}]_2\text{D}_3$  binds first to a specific cytosolic receptor protein and then moves to the nucleus, where transcriptional events are initiated, leading to *de novo* synthesis of calbindin- $\text{D}_{28\text{K}}$ . Calcium-binding proteins such as calbindin- $\text{D}_{28\text{K}}$  have been shown to accelerate diffusion of  $\text{Ca}^{2+}$  through the cytosolic compartment (Feher, 1983; Feher *et al.*

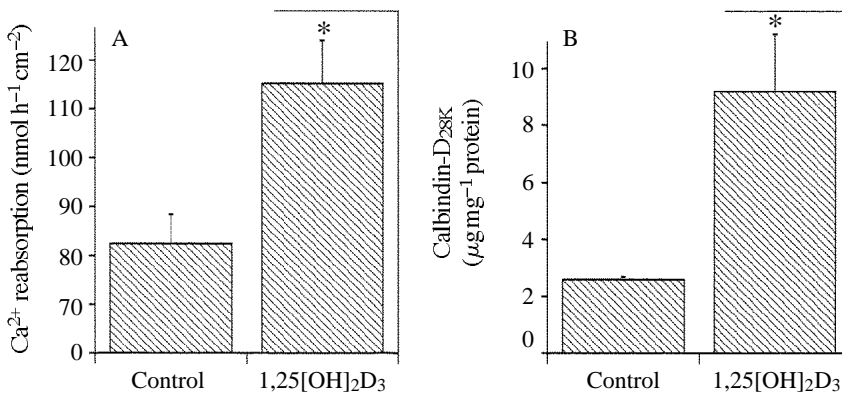

Fig. 8. Effect of 1,25-dihydroxyvitamin  $\text{D}_3$   $1,25[\text{OH}]_2\text{D}_3$  on transcellular  $\text{Ca}^{2+}$  transport (A) and cytosolic calbindin- $\text{D}_{28\text{K}}$  concentration (B) in rabbit cortical collecting system in primary culture. Preincubations with  $1,25[\text{OH}]_2\text{D}_3$  were performed for 48h ( $10^{-7} \text{ mol l}^{-1}$ , basolateral side). Values are mean + s.e. ( $N=5$ ). \* denotes a significantly different value from the control ( $P<0.05$ ). Modified after Bindels *et al.* (1991a).

1992). In addition, another genomic response of  $1,25[\text{OH}]_2\text{D}_3$  was recently demonstrated in the intestine (Wasserman *et al.* 1992; Cai *et al.* 1993), where it was shown that  $1,25[\text{OH}]_2\text{D}_3$  increased the net synthesis of the basolateral  $\text{Ca}^{2+}$  pump through an increase in  $\text{Ca}^{2+}$  pump gene expression (Cai *et al.* 1993). This intriguing finding has not yet been observed in the kidney.

At the cellular level, there are indications that several  $\text{Ca}^{2+}$  transporters participate in the transcellular movement of  $\text{Ca}^{2+}$ , as summarized in Fig. 9. Until now the molecular nature of the luminal  $\text{Ca}^{2+}$  entry pathway in the connecting tubule has been unknown. However, some properties of  $\text{Ca}^{2+}$  influx have been revealed. In isolated perfused rabbit connecting tubules, an apical  $\text{Ca}^{2+}$  influx has been suggested by the dependency of  $[\text{Ca}^{2+}]_i$  on luminal  $\text{Ca}^{2+}$  (Bourdeau and Lau, 1992). In the same preparation, PTH stimulates  $\text{Ca}^{2+}$  influx across the luminal membrane, probably *via* activation of a cyclic-AMP-dependent protein kinase (Bourdeau and Lau, 1989). Preliminary studies performed on primary cultures of rabbit cortical collecting system demonstrated that  $\text{Ca}^{2+}$  influx was strongly inhibited by luminal acidification (Bindels *et al.* 1992*b*). The mechanism of inhibition resided at the external surface of the apical membrane. Our results are, therefore, at variance with the operation of an apical  $\text{Ca}^{2+}/\text{H}^+$  exchanger, as suggested by Bourdeau and Lau (1992). These authors noticed that acute changes in luminal and cellular pH slightly influenced  $[\text{Ca}^{2+}]_i$  in isolated perfused connecting tubules. Their findings are also consistent with an effect of pH on other  $\text{Ca}^{2+}$  channels.

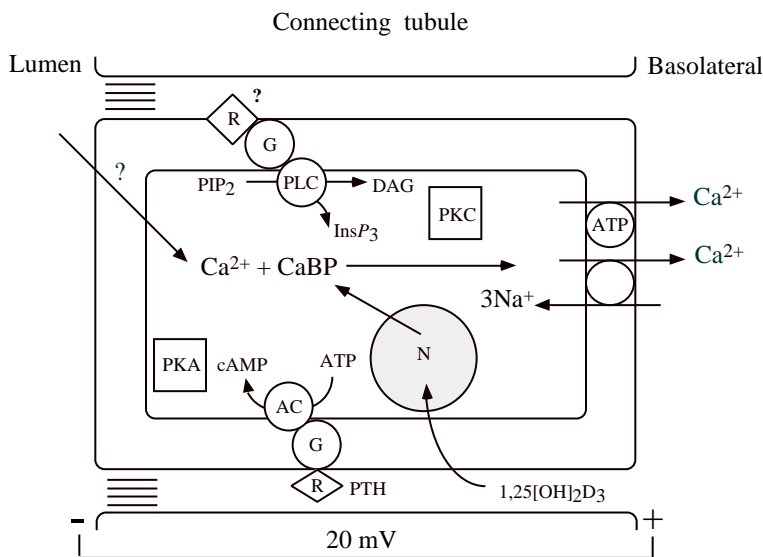

Fig. 9. Model of transcellular  $\text{Ca}^{2+}$  transport in the connecting tubule. For an explanation, see the text.  $\text{Ca}^{2+}$  transport is regulated through pathways dependent on protein kinases A and C. AC, adenylate cyclase; CaBP, a calcium-binding protein such as calbindin- $\text{D}_{28\text{k}}$ ; DAG, diacylglycerol; G, G-protein;  $\text{InsP}_3$ , inositol trisphosphate;  $\text{PIP}_2$ , phosphatidylinositol 4,5-bisphosphate; PKA, protein kinase A; PKC, protein kinase C; PLC, phospholipase C; PTH, parathyroid hormone; R, receptor; cAMP, cyclic AMP; N, nucleus.

From our studies, the involvement of  $\text{Ca}^{2+}$  channels resembling the voltage-dependent types seems unlikely, since administration of  $\text{Ca}^{2+}$  entry blockers, such as methoxyverapamil, diltiazem, flunarizine and felodipine, had no effect on  $\text{Ca}^{2+}$  transport (Bindels *et al.* 1992a,b). Taken together, these data are consistent with a pH-sensitive  $\text{Ca}^{2+}$  channel regulated by a cyclic-AMP-dependent kinase, but they do not prove the existence of such a channel. Therefore, more work is needed to define the nature of this putative channel.

Our observation that the calcitriol-induced increase in transcellular  $\text{Ca}^{2+}$  transport is accompanied by a substantial increase in cytosolic calbindin- $\text{D}_{28\text{K}}$  confirms the idea that calbindin- $\text{D}_{28\text{K}}$  facilitates diffusion of  $\text{Ca}^{2+}$  through the cytosol (Bindels *et al.* 1991a). These findings are in line with studies performed in the mammalian intestine, where  $1,25[\text{OH}]_2\text{D}_3$  also stimulates  $\text{Ca}^{2+}$  absorption and increases the cellular content of calbindin- $\text{D}_{9\text{K}}$  (Gross and Kumar, 1990).

Finally,  $\text{Ca}^{2+}$  must be extruded at the basolateral membrane against an electrochemical gradient. Two transport mechanisms exist in this membrane. One is a high-affinity  $\text{Ca}^{2+}$ -ATPase, whose activity is highest in the connecting tubule (Doucet and Katz, 1982). The presence of the  $\text{Na}^+/\text{Ca}^{2+}$  antiporter exclusively in the basolateral membrane of the rabbit connecting tubule has been demonstrated by cytochemistry (Reilly *et al.* 1992). Several investigators evaluated the role of this extrusion mechanism in the regulation of  $[\text{Ca}^{2+}]_i$  by measuring  $[\text{Ca}^{2+}]_i$  during selective manipulation of extracellular  $[\text{Na}^+]$  (Taniguchi *et al.* 1989; Bourdeau and Lau, 1990). For instance, it has been shown that, in isolated perfused tubules,  $[\text{Ca}^{2+}]_i$  rose upon removal of  $\text{Na}^+$  from the bathing medium and that this increase was virtually abolished in the absence of luminal  $\text{Na}^+$  or basolateral  $\text{Ca}^{2+}$  (Bourdeau and Lau, 1990). In addition to involvement in regulating  $[\text{Ca}^{2+}]_i$ , this antiporter may participate in transcellular  $\text{Ca}^{2+}$  transport. Shimizu *et al.* (1990) demonstrated a decrease in  $\text{Ca}^{2+}$  reabsorption on removal of bath  $\text{Na}^+$  or following treatment with ouabain. In primary cultures of the cortical collecting system, a dose-dependent relationship between basolateral  $[\text{Na}^+]$  and transcellular  $\text{Ca}^{2+}$  transport was found and a Hill coefficient of around 2 pointed to at least two binding sites for  $\text{Na}^+$  on the  $\text{Na}^+/\text{Ca}^{2+}$  exchanger (Bindels *et al.* 1992a). Ouabain inhibited  $\text{Ca}^{2+}$  transport to the same extent as did  $\text{Na}^+$ -free solutions. Depolarisation of the basolateral membrane, by raising basolateral  $[\text{K}^+]$ , also decreased transcellular  $\text{Ca}^{2+}$  transport, which suggests that the  $\text{Ca}^{2+}$  extrusion is electrogenic. Bourdeau and Lau (1990) calculated that the exchanger is quiescent under control physiological conditions because the net driving force for  $\text{Na}^+$  and  $\text{Ca}^{2+}$  movements are balanced. Consequently,  $\text{Na}^+/\text{Ca}^{2+}$  exchange does not contribute to  $\text{Ca}^{2+}$  extrusion under physiological conditions. This is not in agreement with our observations, since reduction in basolateral  $[\text{Na}^+]$  from  $150$  to  $100\text{mmol l}^{-1}$  did not reduce  $\text{Ca}^{2+}$  transport across the cultured collecting tubules. However, lowering  $[\text{Na}^+]$  to  $50\text{mmol l}^{-1}$  significantly reduced  $\text{Ca}^{2+}$  transport. Taken together, these results suggest that connecting tubules exhibit a basolateral  $\text{Na}^+/\text{Ca}^{2+}$  exchanger which contributes to transcellular  $\text{Ca}^{2+}$  transport and is involved in regulating  $[\text{Ca}^{2+}]_i$ . In primary cultures of the rabbit cortical collecting system, a residual  $\text{Ca}^{2+}$  absorption of approximately 40% was always observed, regardless of the mode of inhibition. The partial inhibition caused by removal of basolateral  $\text{Na}^+$  and treatment with ouabain suggests that a  $\text{Ca}^{2+}$  extrusion

mechanism other than  $\text{Na}^+/\text{Ca}^{2+}$  exchange participates in  $\text{Ca}^{2+}$  reabsorption. This residual  $\text{Ca}^{2+}$  absorption probably reflects the activity of a basolateral  $\text{Ca}^{2+}$ -ATPase. Unfortunately, no specific inhibitors are available to evaluate the role of this transporter directly.

### Collecting duct

The contribution of this terminal segment to overall  $\text{Ca}^{2+}$  reabsorption is small and the nature of the transport is controversial. Some studies reported an insignificant net  $\text{Ca}^{2+}$  flux that was voltage-dependent (Shareghi and Stoner, 1981; Bourdeau and Hellstrom-Stein, 1982). At variance with these results are those of Shimizu *et al.* (1990), who found a net  $\text{Ca}^{2+}$  reabsorption which, owing to the lumen-negative voltage in the cortical collecting duct, must proceed *via* a transcellular pathway. In line with this active component is the presence of calbindin-D<sub>28K</sub> in the cortical portion of this segment in the rabbit. The cellular mechanisms of  $\text{Ca}^{2+}$  reabsorption await further investigations.

### Cellular $\text{Ca}^{2+}$ traffic and $\text{Ca}^{2+}$ signalling

Renal cells involved in transcellular  $\text{Ca}^{2+}$  transport are continuously challenged by a substantial  $\text{Ca}^{2+}$  traffic through the cytosol while simultaneously maintaining low levels of  $[\text{Ca}^{2+}]_i$ . Calcium-binding protein, which is exclusively present in these renal cells, could fulfil this paradoxical function. In cultured cells of the rabbit cortical collecting system, the average calbindin-D<sub>28K</sub> concentration amounts to at least  $70 \mu\text{mol l}^{-1}$  (Bindels *et al.* 1991a). According to Feher (1983), the calbindin-D<sub>28K</sub> concentration in the cytosol should reach values of  $50 \mu\text{mol l}^{-1}$  or higher to facilitate cytosolic  $\text{Ca}^{2+}$  diffusion significantly. Consequently, calbindin-D<sub>28K</sub> concentration in the cultured cells is high enough to play a significant role in cytosolic  $\text{Ca}^{2+}$  movement. The cellular calbindin-D<sub>28K</sub> content is regulated by  $1,25[\text{OH}]_2\text{D}_3$  (Kumar, 1990). It is, therefore, conceivable that the stimulation of  $\text{Ca}^{2+}$  reabsorption by this hormone, as demonstrated in the cultured cortical collecting system cells, is due to the increased calbindin-D<sub>28K</sub> content. Calbindin-D<sub>28K</sub> also acts as a  $\text{Ca}^{2+}$  buffer: during changes in transcellular  $\text{Ca}^{2+}$  transport rates,  $[\text{Ca}^{2+}]_i$  remains buffered between 100 and  $200 \text{nmol l}^{-1}$ . Stimulated levels of  $\text{Ca}^{2+}$  transport were never accompanied by an elevation in  $[\text{Ca}^{2+}]_i$  (R. J. M. Bindels, unpublished observation). However, in the same cell preparation, oscillations in  $[\text{Ca}^{2+}]_i$  could be provoked irrespective of the calbindin-D<sub>28K</sub> concentration (Koster *et al.* 1993). Similar  $\text{Ca}^{2+}$  oscillations were observed in intercalated cells, but here calbindin-D<sub>28K</sub> is totally absent (Fig. 10). These findings suggest that, at physiological  $[\text{Ca}^{2+}]_i$ , calbindin-D<sub>28K</sub> is saturated with  $\text{Ca}^{2+}$ , which is in line with an affinity of calbindin-D<sub>28K</sub> for  $\text{Ca}^{2+}$  in the nanomolar range, as suggested by Feher (1983). Consequently,  $\text{Ca}^{2+}$  signalling regulating transport of other ions can occur during and independently of transcellular  $\text{Ca}^{2+}$  movement. For example,  $\text{Na}^+$  reabsorption and  $\text{K}^+$  secretion in the distal nephron are partly regulated by the activity of  $[\text{Ca}^{2+}]_i$ -dependent  $\text{Na}^+$  and  $\text{K}^+$  channels, respectively (Hébert *et al.* 1991; Schlatter *et al.* 1993). Besides these initial data, further

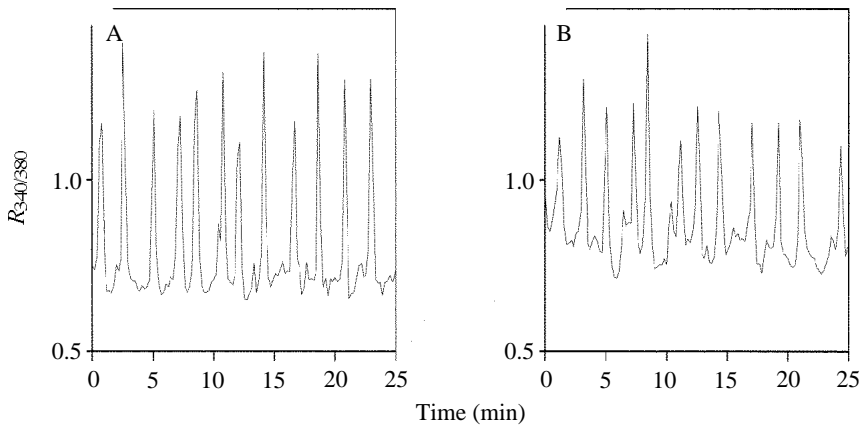

Fig. 10.  $[Ca^{2+}]_i$  oscillations induced in extracellular  $Na^+$ -free medium measured simultaneously in a connecting tubule (A) and an intercalated (B) cell from the rabbit renal cortical collecting system in primary culture using digital imaging.  $R_{340/380}$  represents the Fura-2 340nm/380nm excitation fluorescence emission ratio: a measure of  $[Ca^{2+}]_i$ . Intercalated cells were positively identified by peanut lectin staining. Representative traces of four experiments are shown (A,B). Modified after Koster *et al.* (1993).

experiments are needed to unravel the complex relationship between transcellular  $Ca^{2+}$  transport and  $[Ca^{2+}]_i$  homeostasis.

The author thanks Dr C. H. van Os for helpful criticism of the manuscript and for stimulating discussions, and expresses his gratitude to Drs J. Dempster, A. Hartog, H. Koster, P. Ramakers and P. Willems for stimulating support. Work in the author's laboratory has been partly funded by the Dutch Kidney Foundation (grant nos 87.0716 and 91.1112) and by the Netherlands Organisation for Scientific Research (NWO grant no. 900.541.122).

### References

- BACSKAI, B. M. AND FRIEDMAN, P. A. (1990). Activation of latent  $Ca^{2+}$  channels in renal epithelial cells by parathyroid hormone. *Nature* **347**, 388–391.
- BINDELS, R. J. M., DEMPSTER, J. A., RAMAKERS, P. L. M., WILLEMS, P. G. H. M. AND VAN OS, C. H. (1993). Effect of protein kinase C activation and down-regulation on active calcium transport across rabbit renal collecting system. *Kidney Int.* **43**, 295–300.
- BINDELS, R. J. M., HARTOG, A., TIMMERMANS, J. A. H. AND VAN OS, C. H. (1991a). Active  $Ca^{2+}$  transport in primary cultures of rabbit kidney CCD: stimulation by 1,25-dihydroxyvitamin D3 and PTH. *Am. J. Physiol.* **261**, F799–F807.
- BINDELS, R. J. M., RAMAKERS, P. L. M., DEMPSTER, J. A., HARTOG, A. AND VAN OS, C. H. (1992a). Role of  $Na^+-Ca^{2+}$  exchange in transcellular  $Ca^{2+}$  transport across primary cultures of rabbit kidney collecting system. *Pflügers Arch. Eur. J. Physiol.* **420**, 566–572.
- BINDELS, R. J. M., RAMAKERS, P. L. M., HARTOG, A., ABRAHAMSE, S. L. AND VAN OS, C. H. (1992b). Characterisation of apical  $Ca^{2+}$  entry in rabbit cortical collecting system in primary culture. *J. Am. Soc. Nephrol.* **3**, 681.
- BINDELS, R. J. M., TIMMERMANS, J. A. H., HARTOG, A., COERS, W. AND VAN OS, C. H. (1991b). Calbindin-D<sub>9K</sub> and parvalbumin are exclusively located along basolateral membranes in rat distal nephron. *J. Am. Soc. Nephrol.* **2**, 1122–1129.

- BORKE, J. L., CARIDE, A., VERMA, A. K., PENNISTON, J. T. AND KUMAR, R. (1989). Plasma membrane calcium pump and 28-kDa calcium binding protein in cells of rat kidney distal tubules. *Am. J. Physiol.* **257**, F842–F849.
- BORKE, J. L., MINAMI, J., VERMA, A. K., PENNISTON, J. T. AND KUMAR, R. (1987). Monoclonal antibodies to human erythrocyte membrane  $\text{Ca}^{2+}$ - $\text{Mg}^{2+}$  adenosine triphosphatase pump recognize an epitope in the basolateral membrane of human kidney distal tubule cells. *J. clin. Invest.* **80**, 1225–1231.
- BOURDEAU, J. E. AND BURG, M. B. (1979). Voltage dependence of calcium transport in the thick ascending limb of Henle's loop. *Am. J. Physiol.* **236**, F357–F364.
- BOURDEAU, J. E. AND HELLSTROM-STEIN, R. J. (1982). Voltage-dependent calcium movement across the cortical collecting duct. *Am. J. Physiol.* **242**, F285–F292.
- BOURDEAU, J. E. AND LAU, K. (1989). Effects of parathyroid hormone on cytosolic free calcium concentration in individual rabbit connecting tubules. *J. clin. Invest.* **83**, 373–379.
- BOURDEAU, J. E. AND LAU, K. (1990). Basolateral cell membrane Ca–Na exchange in single rabbit connecting tubules. *Am. J. Physiol.* **258**, F1497–F1503.
- BOURDEAU, J. E. AND LAU, K. (1992). Regulation of cytosolic free calcium concentration in the rabbit connecting tubule – A calcium-absorbing renal epithelium. *J. Lab. clin. Med.* **119**, 650–662.
- BURNATOWSKA-HLEDIN, M. A. AND SPIELMAN, W. S. (1989). Vasopressin V1 receptors on the principal cells of the rabbit cortical collecting tubule: stimulation of cytosolic free calcium and inositol phosphate production *via* coupling to a pertussis toxin substrate. *J. clin. Invest.* **83**, 84–89.
- CAI, Q., CHANDLER, J. S., WASSERMAN, R. H., KUMAR, R. AND PENNISTON, J. T. (1993). Vitamin-D and adaptation to dietary calcium and phosphate deficiencies increase intestinal plasma membrane calcium pump gene expression. *Proc. natn. Acad. Sci. U.S.A.* **90**, 1345–1349.
- COSTANZO, L. S. AND WINDHAGER, E. E. (1978). Calcium and sodium transport by the distal convoluted tubule in the rat. *Am. J. Physiol.* **235**, F492–F506.
- COSTANZO, L. S. AND WINDHAGER, E. E. (1992). Renal regulation of calcium balance. In *The Kidney: Physiology and Pathophysiology* (ed. D. W. Seldin and G. Giebisch), pp. 2375–2393. New York: Raven Press Ltd.
- DOUCET, A. AND KATZ, A. I. (1982). High-affinity Ca–Mg-ATPase along the rabbit nephron. *Am. J. Physiol.* **242**, F346–F352.
- FEHER, J. J. (1983). Facilitated calcium diffusion by intestinal calcium-binding protein. *Am. J. Physiol.* **244**, C303–C307.
- FEHER, J. J., FULLMER, C. S. AND WASSERMAN, R. H. (1992). Role of facilitated diffusion of calcium by calbindin in intestinal calcium absorption. *Am. J. Physiol.* **262**, C517–C526.
- FRIEDMAN, P. A. (1988). Basal and hormone-activated calcium absorption in mouse renal thick ascending limbs. *Am. J. Physiol.* **254**, F62–F70.
- FRIEDMAN, P. A. AND GESEK, F. A. (1993). Calcium transport in renal epithelial cells. *Am. J. Physiol.* **264**, F181–F198.
- GESEK, F. A. AND FRIEDMAN, P. A. (1992). On the mechanism of parathyroid hormone stimulation of calcium uptake by mouse distal convoluted tubule cells. *J. clin. Invest.* **90**, 749–758.
- GROSS, M. AND KUMAR, R. (1990). Physiology and biochemistry of vitamin D-dependent calcium binding proteins. *Am. J. Physiol.* **259**, F195–F209.
- HANAOKA, K., SAKAI, O., IMAI, M. AND YOSHITOMI, K. (1993). Mechanisms of calcium transport across the basolateral membrane of the rabbit cortical thick ascending limb of Henle's loop. *Pflügers Arch. Eur. J. Physiol.* **422**, 339–346.
- HÉBERT, R. L., JACOBSON, H. R. AND BREYER, M. D. (1991). Prostaglandin  $\text{E}_2$  inhibits sodium transport in rabbit cortical collecting duct by increasing intracellular calcium. *J. clin. Invest.* **87**, 1992–1998.
- HRUSKA, K. A., MOSKOWITZ, D., ESBRIT, P., CIVITELLI, R., WESTBROOK, S. AND HUSKEY, M. (1987). Stimulation of inositol triphosphate and diacylglycerol production in renal tubular cells by parathyroid hormone. *J. clin. Invest.* **79**, 230–239.
- IMAI, M. (1978). Calcium transport across the rabbit thick ascending limb of Henle's loop perfused *in vitro*. *Pflügers Arch. Eur. J. Physiol.* **374**, 255–263.
- IMAI, M. (1989). Effects of parathyroid hormone and N,O-dibutyl cyclic AMP on  $\text{Ca}^{2+}$  transport across the rabbit distal nephron segment perfused *in vitro*. *Pflügers Arch. Eur. J. Physiol.* **390**, 145–151.
- KOSTER, H. P. G., VAN OS, C. H. AND BINDELS, R. J. M. (1993).  $\text{Ca}^{2+}$  oscillations in cells from the rabbit renal cortical collecting system induced by  $\text{Na}^+$ -free solutions. *Kidney Int.* **43**, 828–836.
- KUMAR, R. (1990). Vitamin D metabolism and mechanism of calcium transport. *J. Am. Soc. Nephrol.* **1**, 30–42.

- MADSEN, K. M., VERLANDER, J. W. AND TISHER, C. C. (1988). Relationship between structure and function in distal tubule and collecting duct. *J. Electron Microsc. Techn.* **9**, 187–208.
- MAGOCSI, M., YAMAKI, M., PENNISTON, J. T. AND DOUSA, T. P. (1992). Localization of messenger RNAs coding for isozymes of plasma membrane  $\text{Ca}^{2+}$ -ATPase pump in rat kidney. *Am. J. Physiol.* **263**, F7–F14.
- MOREL, F. (1981). Sites of hormone action in the mammalian nephron. *Am. J. Physiol.* **240**, F159–F164.
- NG, R. C. K., ROUSE, D. AND SUKI, W. N. (1984). Calcium transport in the rabbit superficial proximal convoluted tubule. *J. clin. Invest.* **74**, 834–842.
- PONCET, V., MEROT, J. AND POUJEOL, P. (1992). A calcium-permeable channel in the apical membrane of primary cultures of the rabbit distal bright convoluted tubule. *Pflügers Arch. Eur. J. Physiol.* **422**, 112–119.
- REILLY, R. F. AND SHUGRUE, C. A. (1992). cDNA cloning of a renal  $\text{Na}^{+}$ - $\text{Ca}^{2+}$  exchanger. *Am. J. Physiol.* **262**, F1105–F1109.
- REILLY, R. F., SHUGRUE, C. A., PHILIPSON, K. AND BIEMESDERFER, D. (1992). Immunolocalization of the  $\text{Na}^{+}/\text{Ca}^{2+}$  exchanger in rat kidney. *J. Am. Soc. Nephrol.* **3**, 689.
- ROUSE, D., NG, R. C. K. AND SUKI, W. N. (1980). Calcium transport in the pars recta and thin descending limb of Henle of the rabbit, perfused *in vitro*. *J. clin. Invest.* **65**, 37–42.
- SCHLATTER, E., BLEICH, M., HIRSCH, J., MARKSTÄHLER, U., FROBE, U. AND GREGER, R. (1993). Cation specificity and pharmacological properties of the  $\text{Ca}^{2+}$ -dependent  $\text{K}^{+}$  channel of rat cortical collecting ducts. *Pflügers Arch. Eur. J. Physiol.* **422**, 481–491.
- SCHREINER, D. S., JANDE, S. S., PARKES, C. O., LAWSON, D. E. M. AND THOMASSET, M. (1983). Immunocytochemical demonstration of two vitamin D-dependent calcium-binding proteins in mammalian kidney. *Acta anat.* **117**, 1–14.
- SHAREGHI, G. R. AND STONER, L. C. (1981). Calcium transport across segments of the rabbit distal nephron *in vitro*. *Am. J. Physiol.* **235**, F367–F375.
- SHAYMAN, J. A. AND MORRISON, A. R. (1985). Bradykinin-induced changes in phosphatidyl inositol turnover in cultured rabbit papillary collecting tubule cells. *J. clin. Invest.* **76**, 978–984.
- SHIMIZU, T., YOSHITOMI, K., NAKAMURA, M. AND IMAI, M. (1990). Effects of PTH, calcitonin and cyclic AMP on calcium transport in rabbit distal nephron segments. *Am. J. Physiol.* **259**, F408–F414.
- SUKI, W. N. (1979). Calcium transport in the nephron. *Am. J. Physiol.* **237**, F1–F6.
- SUKI, W. N. AND ROUSE, D. (1992). Renal transport of calcium, magnesium and phosphorus. In *The Kidney*, fourth edition (ed. B. M. Brenner and F. C. Rector), pp. 380–423. Philadelphia, USA: W. B. Saunders Company.
- SUKI, W. N., ROUSE, D., NG, R. C. AND KOKKO, J. P. (1980). Calcium transport in the thick ascending limb of Henle. Heterogeneity of function in the medullary and cortical segments. *J. clin. Invest.* **66**, 1004–1009.
- TANIGUCHI, S., MARCHETTI, F. AND MOREL, F. (1989). Cytosolic free calcium in single microdissected rat cortical collecting tubules. *Pflügers Arch. Eur. J. Physiol.* **414**, 125–133.
- TAYLOR, A. N., MCINTOSH, J. E. AND BOURDEAU, J. E. (1982). Immunocytochemical localization of vitamin D-dependent calcium-binding protein in renal tubules of rabbit, rat and chick. *Kidney Int.* **21**, 765–773.
- VAN OS, C. H. (1987). Transcellular calcium transport in intestinal and renal epithelial cells. *Biochim. biophys. Acta* **906**, 195–222.
- WASSERMAN, R. H., SMITH, C. A., BRINDAK, M. E., DE TALAMONI, N., FULLMER, C. S., PENNISTON, J. T. AND KUMAR, R. (1992). Vitamin D and mineral deficiencies increase the plasma membrane calcium pump of chicken intestine. *Gastroenterol.* **102**, 886–894.
- WITTNER, M., MANDON, B., ROINEL, N., DE ROUFFIGNAC, C. AND DI STEFANO, A. (1993). Hormonal stimulation of  $\text{Ca}^{2+}$  and  $\text{Mg}^{2+}$  transport in the cortical thick ascending limb of Henle's loop of the mouse: evidence for a change in the paracellular pathway permeability. *Pflügers Arch. Eur. J. Physiol.* **423**, 387–396.
- YU, A. S. L., HEBERT, S. C., BRENNER, B. M. AND LYTTON, J. (1992a). Molecular characterization and nephron distribution of a family of transcripts encoding the pore-forming subunit of  $\text{Ca}^{2+}$  channels in the kidney. *Proc. natn. Acad. Sci. U.S.A.* **9**, 10494–10498.
- YU, A. S. L., HEBERT, S. C., LEE, S., BRENNER, B. M. AND LYTTON, J. (1992b). Identification and localization of renal  $\text{Na}^{+}$ - $\text{Ca}^{2+}$  exchanger by polymerase chain reaction. *Am. J. Physiol.* **263**, F680–F685.
